# Supplementary material for: The role of gut microbiota in a generalist, golden snub-nosed monkey, adaptation to geographical diet change
Source: PubMed Central journal article supplement — Anim Microbiome. 2024 Nov 5;6:63. doi: 10.1186/s42523-024-00349-w (PMC11536711; doi:10.1186/s42523-024-00349-w), 2024-11-05
Supplement: 42523_2024_349_MOESM1_ESM.pdf [file 42523_2024_349_MOESM1_ESM.pdf]

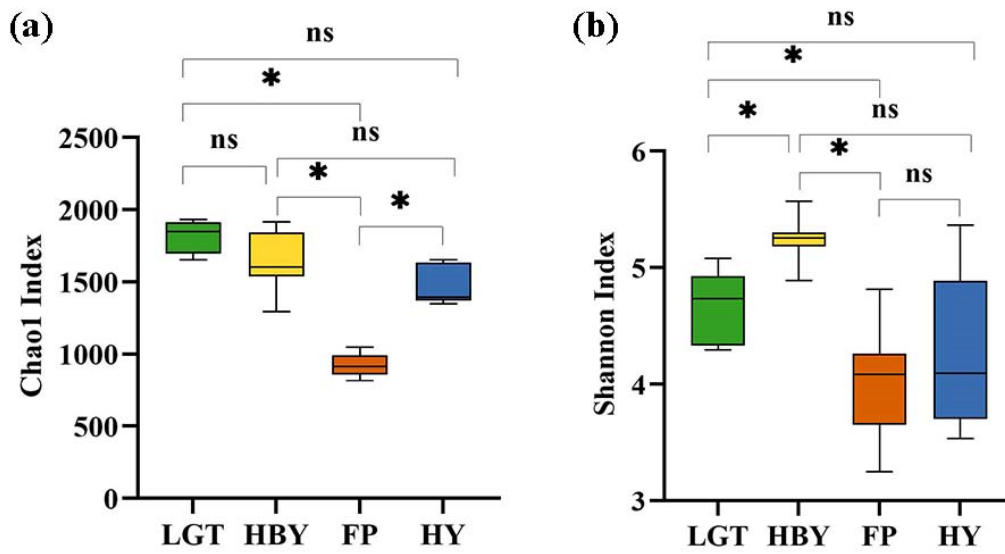

Supplementary Figure 1 Differences in Alpha diversity of gut microbiota of golden snub-nosed monkey populations in different regions

Differences in Chao 1 Index between populations in different regions(a), Differences in Shannon Index between populations in different regions (b). The asterisk (\*) indicates statistical significance at the  $P < 0.05$ . (Kruskal-Wallis test).

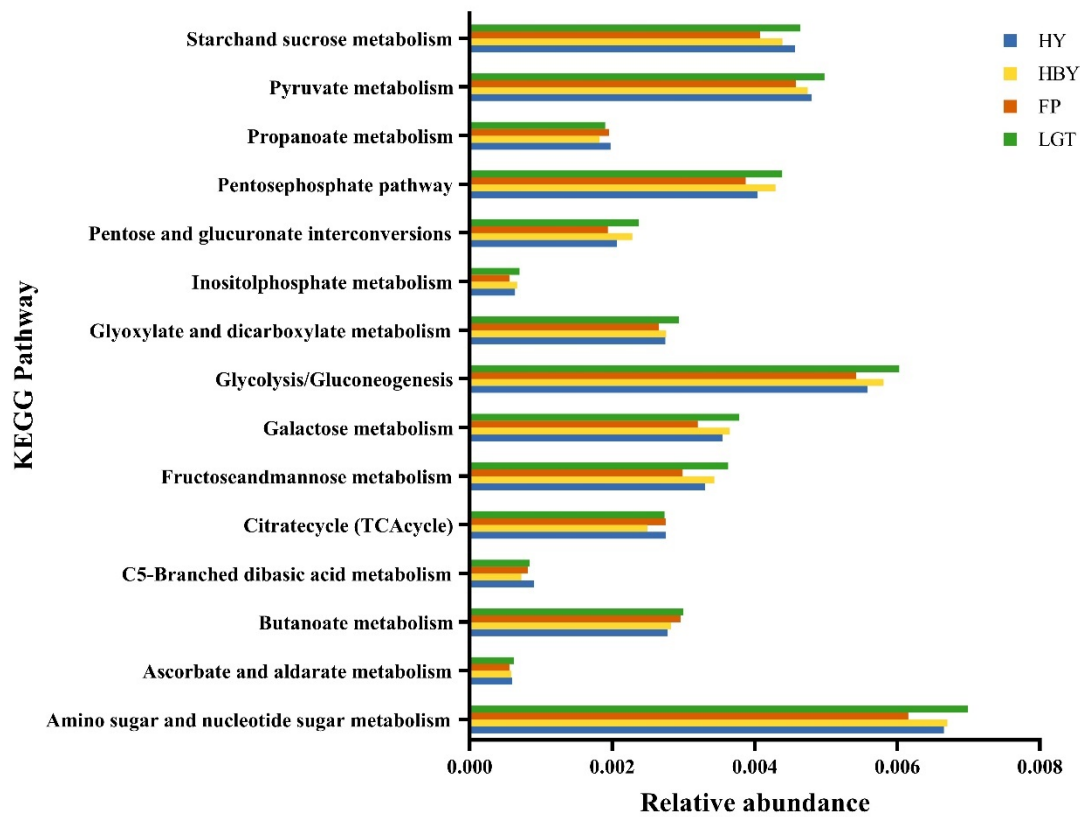

Supplementary Figure 2 Relative abundance of carbohydrate metabolic pathways in golden snub-nosed monkey from different regions.
