# Supplementary material for: The role of gut microbiota in a generalist, golden snub-nosed monkey, adaptation to geographical diet change
Source: PubMed Central journal article supplement — Anim Microbiome. 2024 Nov 5;6:63. doi: 10.1186/s42523-024-00349-w (PMC11536711; doi:10.1186/s42523-024-00349-w), 2024-11-05
Supplement: 42523_2024_349_MOESM2_ESM.pdf [file 42523_2024_349_MOESM2_ESM.pdf]

Supplementary Table Sample collection information

| Region | Feeding data from different individuals           | Individuals who collected faecal samples from individuals with feeding data |
|--------|---------------------------------------------------|-----------------------------------------------------------------------------|
| FP     | 23                                                | 23                                                                          |
| LGT    | 10                                                | 6                                                                           |
| HBY    | 18                                                | 10                                                                          |
| HY     | 5 for average of total food intake in this region | 5 for random adult individuals from this region                             |
